# Supplementary material for: A Survey on the Distribution of Ovothiol and ovoA Gene Expression in Different Tissues and Cells: A Comparative Analysis in Sea Urchins and Mussels
Source: MDPI journal article supplement (doi:10.3390/md20040268), 2022-04-15
Supplement: s1 [file s1]

# A survey on the distribution of ovothiol and *ovoA* gene expres-sion in different tissues and cells: a comparative analysis in sea urchin and mussels

Carola Murano<sup>1,2</sup>, Annalisa Zuccarotto<sup>1</sup>, Serena Leone<sup>1</sup>, Marco Sollitto<sup>3</sup>, Marco Gerdol<sup>3</sup>, Immacolata Castellano<sup>1,4</sup>, and Anna Palumbo<sup>1,\*</sup>

<sup>1</sup> Department of Biology and Evolution of Marine Organisms, Stazione Zoologica Anton Dohrn, Naples, Italy;

<sup>2</sup> Department of Integrative Marine Ecology, Stazione Zoologica Anton Dohrn; Naples, Italy;

<sup>3</sup> Department of Life Sciences, University of Trieste, Trieste, Italy;

<sup>4</sup> Department of Molecular Medicine and Medical Biotechnology, University of Naples Federico II, Italy

\* Correspondence: A.P. [anna.palumbo@szn.it](mailto:anna.palumbo@szn.it)

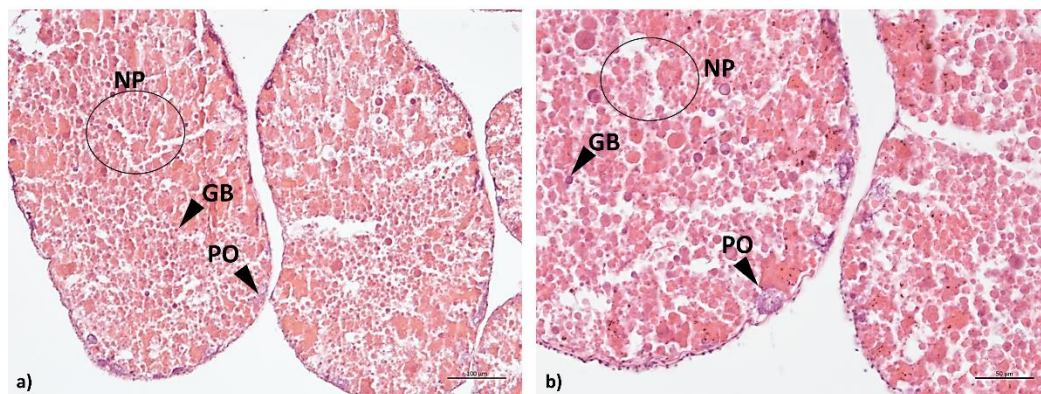

**Figure S1.** Histology of *P. lividus* ovaries. (a-b) Cross-section through the acinus of the ovary in the recovery stage (Stage I, according to Byrne (1990)). PO, previtellogenic oocytes; NP, nutritive phagocytes; GB, nutritive phagocytes with nutritive droplets. Scale bars: (a)= 100 μm and (b)= 50 μm.

**Table S1.** RNAseq raw-data (NCBI Sequence Read Archive database) found for *M. galloprovincialis*

| Bioproject  | SRA accession | Species                          | Tissue          |
|-------------|---------------|----------------------------------|-----------------|
| PRJNA88481  | SRR442036     | <i>Mytilus galloprovincialis</i> | digestive gland |
| PRJNA230138 | SRR1046119    | <i>Mytilus galloprovincialis</i> | gills           |
| PRJNA230138 | SRR1042397    | <i>Mytilus galloprovincialis</i> | hemocytes       |
| PRJNA230138 | SRR1045900    | <i>Mytilus galloprovincialis</i> | hemocytes       |
| PRJNA230138 | SRR1046115    | <i>Mytilus galloprovincialis</i> | mantle          |
| PRJNA230138 | SRR1046116    | <i>Mytilus galloprovincialis</i> | mantle          |
| PRJNA638821 | SRR11996464   | <i>Mytilus galloprovincialis</i> | gills           |
| PRJNA638821 | SRR11996686   | <i>Mytilus galloprovincialis</i> | gills           |
| PRJNA638821 | SRR11996723   | <i>Mytilus galloprovincialis</i> | gills           |

|                   |                      |                                  |                 |
|-------------------|----------------------|----------------------------------|-----------------|
| PRJNA611904       | SRR11285774          | <i>Mytilus galloprovincialis</i> | digestive gland |
| PRJNA611904       | SRR11285775          | <i>Mytilus galloprovincialis</i> | digestive gland |
| <b>Bioproject</b> | <b>SRA accession</b> | <b>Species</b>                   | <b>Tissue</b>   |
| PRJNA611904       | SRR11285777          | <i>Mytilus galloprovincialis</i> | digestive gland |
| PRJNA611904       | SRR11285778          | <i>Mytilus galloprovincialis</i> | digestive gland |
| PRJNA560413       | SRR9984957           | <i>Mytilus galloprovincialis</i> | mantle          |
| PRJNA560413       | SRR9984958           | <i>Mytilus galloprovincialis</i> | mantle          |
| PRJNA560413       | SRR9984959           | <i>Mytilus galloprovincialis</i> | mantle          |
| PRJNA560413       | SRR9984960           | <i>Mytilus galloprovincialis</i> | mantle          |
| PRJNA560413       | SRR9984961           | <i>Mytilus galloprovincialis</i> | mantle          |
| PRJNA560413       | SRR9984962           | <i>Mytilus galloprovincialis</i> | mantle          |
| PRJNA560413       | SRR9984963           | <i>Mytilus galloprovincialis</i> | mantle          |
| PRJNA560413       | SRR9984964           | <i>Mytilus galloprovincialis</i> | mantle          |
| PRJNA560413       | SRR9984965           | <i>Mytilus galloprovincialis</i> | mantle          |
| PRJNA560413       | SRR9984966           | <i>Mytilus galloprovincialis</i> | mantle          |
| PRJNA560413       | SRR9984967           | <i>Mytilus galloprovincialis</i> | mantle          |
| PRJNA560413       | SRR9984968           | <i>Mytilus galloprovincialis</i> | mantle          |
| PRJNA560413       | SRR9984975           | <i>Mytilus galloprovincialis</i> | mantle          |
| PRJNA560413       | SRR9984976           | <i>Mytilus galloprovincialis</i> | mantle          |
| PRJNA560413       | SRR9984977           | <i>Mytilus galloprovincialis</i> | mantle          |
| PRJNA560413       | SRR9984978           | <i>Mytilus galloprovincialis</i> | mantle          |
| PRJNA560413       | SRR9984979           | <i>Mytilus galloprovincialis</i> | mantle          |
| PRJNA560413       | SRR9984980           | <i>Mytilus galloprovincialis</i> | mantle          |
| PRJNA560413       | SRR9984981           | <i>Mytilus galloprovincialis</i> | mantle          |
| PRJNA560413       | SRR9984982           | <i>Mytilus galloprovincialis</i> | mantle          |
| PRJNA560413       | SRR9984983           | <i>Mytilus galloprovincialis</i> | mantle          |
| PRJNA560413       | SRR9984984           | <i>Mytilus galloprovincialis</i> | mantle          |
| PRJNA560413       | SRR9984985           | <i>Mytilus galloprovincialis</i> | mantle          |
| PRJNA560413       | SRR9984986           | <i>Mytilus galloprovincialis</i> | mantle          |
| PRJNA560413       | SRR9984987           | <i>Mytilus galloprovincialis</i> | mantle          |
| PRJNA560413       | SRR9984988           | <i>Mytilus galloprovincialis</i> | mantle          |
| PRJNA560413       | SRR9984989           | <i>Mytilus galloprovincialis</i> | mantle          |
| PRJNA560413       | SRR9984991           | <i>Mytilus galloprovincialis</i> | mantle          |
| PRJNA560413       | SRR9984992           | <i>Mytilus galloprovincialis</i> | mantle          |
| PRJNA560413       | SRR9984993           | <i>Mytilus galloprovincialis</i> | mantle          |
| PRJNA560413       | SRR9984994           | <i>Mytilus galloprovincialis</i> | mantle          |
| PRJNA560413       | SRR9984995           | <i>Mytilus galloprovincialis</i> | mantle          |
| PRJNA560413       | SRR9984996           | <i>Mytilus galloprovincialis</i> | mantle          |
| PRJNA561723       | SRR10015745          | <i>Mytilus galloprovincialis</i> | digestive gland |
| PRJNA561723       | SRR10015746          | <i>Mytilus galloprovincialis</i> | digestive gland |
| PRJNA561723       | SRR10015747          | <i>Mytilus galloprovincialis</i> | digestive gland |
| PRJNA561723       | SRR10015748          | <i>Mytilus galloprovincialis</i> | digestive gland |
| PRJNA561723       | SRR10015749          | <i>Mytilus galloprovincialis</i> | digestive gland |
| PRJNA561723       | SRR10015750          | <i>Mytilus galloprovincialis</i> | digestive gland |
| PRJNA561723       | SRR10015751          | <i>Mytilus galloprovincialis</i> | digestive gland |
| PRJNA561723       | SRR10015757          | <i>Mytilus galloprovincialis</i> | digestive gland |
| PRJNA561723       | SRR10015766          | <i>Mytilus galloprovincialis</i> | digestive gland |

|                   |                      |                                  |                 |
|-------------------|----------------------|----------------------------------|-----------------|
| PRJNA561723       | SRR10015772          | <i>Mytilus galloprovincialis</i> | digestive gland |
| PRJNA561723       | SRR10015783          | <i>Mytilus galloprovincialis</i> | digestive gland |
| <b>Bioproject</b> | <b>SRA accession</b> | <b>Species</b>                   | <b>Tissue</b>   |
| PRJNA451093       | SRR7044533           | <i>Mytilus galloprovincialis</i> | mantle          |
| PRJNA526432       | SRR8707268           | <i>Mytilus galloprovincialis</i> | gills           |
| PRJNA484309       | SRR7640805           | <i>Mytilus galloprovincialis</i> | gills           |
| PRJNA484309       | SRR7640807           | <i>Mytilus galloprovincialis</i> | gills           |
| PRJNA484309       | SRR7640808           | <i>Mytilus galloprovincialis</i> | gills           |
| PRJNA484309       | SRR7640811           | <i>Mytilus galloprovincialis</i> | gills           |
| PRJNA484309       | SRR7640812           | <i>Mytilus galloprovincialis</i> | gills           |
| PRJNA484309       | SRR7640813           | <i>Mytilus galloprovincialis</i> | gills           |
| PRJNA484309       | SRR7640814           | <i>Mytilus galloprovincialis</i> | gills           |
| PRJNA484309       | SRR7640818           | <i>Mytilus galloprovincialis</i> | gills           |
| PRJNA484309       | SRR7640820           | <i>Mytilus galloprovincialis</i> | gills           |
| PRJNA484309       | SRR7640821           | <i>Mytilus galloprovincialis</i> | gills           |
| PRJNA525609       | SRR8713540           | <i>Mytilus galloprovincialis</i> | mantle          |
| PRJNA525609       | SRR8713541           | <i>Mytilus galloprovincialis</i> | mantle          |
| PRJNA525609       | SRR8713542           | <i>Mytilus galloprovincialis</i> | mantle          |
| PRJNA525609       | SRR8713543           | <i>Mytilus galloprovincialis</i> | mantle          |
| PRJNA525609       | SRR8713544           | <i>Mytilus galloprovincialis</i> | mantle          |
| PRJNA525609       | SRR8713545           | <i>Mytilus galloprovincialis</i> | mantle          |
| PRJNA525609       | SRR8713546           | <i>Mytilus galloprovincialis</i> | mantle          |
| PRJNA525609       | SRR8713547           | <i>Mytilus galloprovincialis</i> | mantle          |
| PRJNA486919       | SRR7725723           | <i>Mytilus galloprovincialis</i> | gills           |
| PRJNA470760       | SRR7145588           | <i>Mytilus galloprovincialis</i> | hemocytes       |
| PRJNA470760       | SRR7145589           | <i>Mytilus galloprovincialis</i> | hemocytes       |
| PRJNA470760       | SRR7145590           | <i>Mytilus galloprovincialis</i> | hemocytes       |
| PRJNA407401       | SRR6041063           | <i>Mytilus galloprovincialis</i> | digestive gland |
| PRJNA407401       | SRR6041064           | <i>Mytilus galloprovincialis</i> | digestive gland |
| PRJNA407401       | SRR6041065           | <i>Mytilus galloprovincialis</i> | digestive gland |
| PRJNA407401       | SRR6041066           | <i>Mytilus galloprovincialis</i> | digestive gland |
| PRJNA326100       | SRR6238453           | <i>Mytilus galloprovincialis</i> | digestive gland |
| PRJNA326100       | SRR6238454           | <i>Mytilus galloprovincialis</i> | digestive gland |
| PRJNA326100       | SRR6238455           | <i>Mytilus galloprovincialis</i> | digestive gland |
| PRJNA326100       | SRR6238446           | <i>Mytilus galloprovincialis</i> | digestive gland |
| PRJNA326100       | SRR6238447           | <i>Mytilus galloprovincialis</i> | digestive gland |

**Table S2.** RNAseq raw-data (NCBI Sequence Read Archive database) found for *P. lividus* and *S. purpuratus*

| Bioproject  | SRA accession | Species                              | Tissue            |
|-------------|---------------|--------------------------------------|-------------------|
| PRJNA625933 | SRR11561266   | <i>Paracentrotus lividus</i>         | testis            |
| PRJNA625934 | SRR11561267   | <i>Paracentrotus lividus</i>         | testis            |
| PRJNA625935 | SRR11561268   | <i>Paracentrotus lividus</i>         | testis            |
| PRJNA625936 | SRR11561269   | <i>Paracentrotus lividus</i>         | ovary             |
| PRJNA625937 | SRR11561270   | <i>Paracentrotus lividus</i>         | ovary             |
| PRJNA625938 | SRR11561271   | <i>Paracentrotus lividus</i>         | ovary             |
| PRJNA264358 | SRR1664663    | <i>Paracentrotus lividus</i>         | 0hpf*             |
| PRJNA264358 | SRR1735496    | <i>Paracentrotus lividus</i>         | 4hpf*             |
| PRJNA264358 | SRR1735498    | <i>Paracentrotus lividus</i>         | 18hpf*            |
| PRJNA264358 | SRR1735500    | <i>Paracentrotus lividus</i>         | 24hpf*            |
| PRJNA264358 | SRR1735501    | <i>Paracentrotus lividus</i>         | 48hpf*            |
| PRJNA81157  | SRR531953     | <i>Strongylocentrotus purpuratus</i> | coelomocytes      |
| PRJNA81157  | SRR531955     | <i>Strongylocentrotus purpuratus</i> | gut               |
| PRJNA81157  | SRR531958     | <i>Strongylocentrotus purpuratus</i> | ovary             |
| PRJNA81157  | SRR532121     | <i>Strongylocentrotus purpuratus</i> | testis            |
| PRJNA531297 | SRR8863032    | <i>Strongylocentrotus purpuratus</i> | unfertilized eggs |

\*used only for the de novo transcriptome assembly
